# Supplementary material for: Fabrication of a Sensitive and Straightforward Electrochemical Sensor Utilizing Molecularly Imprinted Polymers for the Targeted Detection of the Antiretroviral Drug Ritonavir
Source: Research Square preprint supplement (doi:10.21203/rs.3.rs-6910420/v1), 2025-06-23
Supplement: Supplementary file 1 [file 396f957b54d26942203b004b.docx]

**SUPPLEMENTARY MATERIALS**

**FABRICATION OF A SENSITIVE AND STRAIGHTFORWARD ELECTROCHEMICAL SENSOR UTILIZING MOLECULARLY IMPRINTED POLYMERS FOR THE TARGETED DETECTION OF THE ANTIRETROVIRAL DRUG RITONAVIR**

Abdullah Al Faysala, Ahmet Cetinkayab,c, Taner Erdoğand, Sibel A. Ozkane*, Ayşegül Gölcüa*

aIstanbul Technical University, Faculty of Sciences and Letters, Department of Chemistry, Maslak, Istanbul, Türkiye

bUniversity of Health Sciences, Gülhane Faculty of Pharmacy, Department of Analytical Chemistry, Ankara, Türkiye

cHacettepe University, Faculty of Pharmacy, Department of Analytical Chemistry, Ankara, Türkiye

dKocaeli University, Kocaeli Vocational School, Department of Chemistry and Chemical Processing Technologies, Kocaeli, Türkiye

eAnkara University, Faculty of Pharmacy, Department of Analytical Chemistry, Ankara, Türkiye

**Figure S1.** CV voltammograms using the EP technique in a mixture of 10 mM RTV, 10 mM MAA, and 0.1 M aniline solution for 10 cycles at a scan rate of 100 mV/s.

**Figure S2.** The plot of ΔIp values versus (A) template monomer ratio, (B) Number of CV cycles for EP, (C) removal solutions, (D) removal time, and (E) rebinding time.

**Figure S3.** The results of RTV/ANI-co-MAA@MIP-GCE at 5 × 10-12 M RTV with interfering agents present (All measurements were carried out in a 5.0 mM [Fe(CN)6]3−/4− solution).

**Table S1.** The calculated binding energies.

| **RTV: MAA Ratio** | **Binding Energy (kJ/mol)** |
| --- | --- |
| 1:1 | -64.8 |
| 1:2 | -93.2 |
| 1:3 | -109.5 |
| 1:4 | -147.9 |
| 1:5 | -121.0 |
